# Supplementary material for: Dietary Patterns in European and Brazilian Adolescents: Comparisons and Associations with Socioeconomic Factors
Source: Nutrients. 2018 Jan 9;10(1):57. doi: 10.3390/nu10010057 (PMC5793285; doi:10.3390/nu10010057)
Supplement: Supplementary File 1 [file nutrients-10-00057-s001.pdf]

**Additional File 1. Description of the foods that composed each of the 28 food groups included in the factor analysis (HELENA-Europe 2006/2007 and HBS-Brazil 2008/2009).**

|                                          | <b>HELENA - EUROPE</b>                                                                                              | <b>HBS- BRAZIL</b>                                                                                                              |
|------------------------------------------|---------------------------------------------------------------------------------------------------------------------|---------------------------------------------------------------------------------------------------------------------------------|
| <b>Food Groups</b>                       | <b>Composition</b>                                                                                                  | <b>Composition</b>                                                                                                              |
| <b>Bread and bread rolls</b>             | Sliced bread, whole bread, white bread, rolls bread, crispbread, rusks                                              | Salt bread, whole bread                                                                                                         |
| <b>Breakfast cereals</b>                 | Breakfast cereals, oatmeal                                                                                          | Breakfast cereals, oatmeal, porridge                                                                                            |
| <b>Cereals</b>                           | Flour, pasta, rice and other cereals                                                                                | Flour, pasta, rice, rice preparations, whole rice, corn, corn recipes,                                                          |
| <b>Sweet bakery products</b>             | Cakes, pies, biscuits, croissants, brioches                                                                         | Cakes, pies, biscuits, sweet breads diet and light, cakes diet and light                                                        |
| <b>Savory snacks</b>                     | Crisps, salty biscuits, aperitif biscuits                                                                           | Salty biscuits, pizza                                                                                                           |
| <b>Sugar, honey, syrup</b>               | Table sugar, honey, syrup, jam, dessert sauces (excluding chocolate sauce), water ice, sorbet (excluding ice cream) | Table sugar, honey, syrup, jam, brown sugar, candy in sugar syrup                                                               |
| <b>Confectionary non chocolate</b>       | All confectionary non chocolate, candies                                                                            | All confectionary non chocolate, candies                                                                                        |
| <b>Chocolate</b>                         | Chocolate, candy bars, chocolate paste, chocolate confetti/flakes, chocolate sauces                                 | Chocolate, candy bars, chocolate paste, chocolate confetti/flakes, chocolate sauces, cocoa powder                               |
| <b>Vegetable oils, nuts, seeds</b>       | Vegetable oils (olive oil, soya oil, corn oil, canola oil) olives, avocado, nuts, seed spreads                      | Vegetable oils (olive oil, soya oil, corn oil, canola oil) olives, avocado, nuts, seed spreads                                  |
| <b>Butter, animal fats and margarine</b> | Butter, margarine and lipids of mixed origins, animal fats                                                          | Butter, margarine and lipids of mixed origins, animal fats                                                                      |
| <b>Sauces</b>                            | Mayonnaises and similar, dressing sauces, gravy, tomato sauces, other sauces (excluding dessert sauces)             | Mayonnaises and similar, dressing sauces, tomato sauces, other sauces (excluding dessert sauces), condiments (ketchup, mustard) |
| <b>Pulses</b>                            | All types of beans, lentils, chickpeas (others excluding fresh peas, sweet corn and broad bean)                     | All types of beans, lentils, chickpeas, peas                                                                                    |
| <b>Vegetables excluding potatoes</b>     | All the vegetables excluding potatoes                                                                               | All the vegetables excluding potatoes                                                                                           |
| <b>Starch roots and potatoes</b>         | Starch roots, potatoes                                                                                              | Starch roots , potatoes, sweet potatoes, manioc                                                                                 |
| <b>Fruits</b>                            | All fresh fruits                                                                                                    | All fresh fruits                                                                                                                |
| <b>Soups and bouillon</b>                | Soups, bouillon                                                                                                     | Soups, bouillon                                                                                                                 |
| <b>Coffee and tea</b>                    | Coffee and tea                                                                                                      | Coffee and tea                                                                                                                  |
| <b>Fruit and vegetable juices</b>        | Fruit and vegetable juices                                                                                          | Fruit and vegetable juices                                                                                                      |
| <b>Sugar sweetened beverages</b>         | Carbonated, soft, isotonic drinks, including not alcoholic wine, not alcoholic beer                                 | Carbonated, soft, isotonic drinks, including not alcoholic wine, not alcoholic beer                                             |
| <b>Alcoholic beverages</b>               | Beer, wine, cider, other alcoholic beverages                                                                        | Beer, brandy, wine, cider, other alcoholic beverages                                                                            |
| <b>Meat, chicken, sausages and ham</b>   | Cow meat, pork meat, chicken, sausages and ham, beef, veal, mutton/lamb, goat                                       | Cow meat, pork meat, chicken, sausages and ham, beef, canned meat, hamburgers                                                   |
| <b>Fish</b>                              | Fish, crustaceans, mollusks, fish mousse, fish pate, tarama                                                         | Fish, crustaceans, mollusks, fish, canned fish, salt fish                                                                       |
| <b>Eggs</b>                              | Eggs, omelets                                                                                                       | Eggs, omelets                                                                                                                   |
| <b>Milk</b>                              | Milk, white milk, buttermilk                                                                                        | Milk, white milk, whole milk                                                                                                    |
| <b>Dairy products</b>                    | Yogurt, fromage blanc, yogurt                                                                                       | Yogurt, fromage blanc, yogurt beverages,                                                                                        |

|                            |                                                                                                                                                 |                                                                                              |
|----------------------------|-------------------------------------------------------------------------------------------------------------------------------------------------|----------------------------------------------------------------------------------------------|
|                            | beverages, chocolate milk, probiotic beverages                                                                                                  | probiotic beverages                                                                          |
| <b>Cheese</b>              | All cheese excluding fromage blanc (quark)                                                                                                      | All cheese excluding fromage blanc (quark)                                                   |
| <b>Other milk products</b> | Desserts and puddings milk based (including ice cream), flan, mousse, tiramisu, creams (including non-dairy and coffee creams)                  | Desserts and puddings milk based (including ice cream), milkshakes with fruits               |
| <b>Mixed products</b>      | Meat substitutes, vegetarian products, vegetarian burgers, tempeh, tofu, spring roll, products for special nutritional use, other miscellaneous | Lasagna ready for consumption, yakisoba, other miscellaneous, Japanese food, take way foods. |
